# Supplementary material for: A Mating Selection Based on Modified Strengthened Dominance Relation for NSGA-III
Source: MDPI journal article supplement (doi:10.3390/math9222837), 2021-11-10
Supplement: s1 [file s1]

Table S1  
Comparison of HV and Statistical Results on DTLZ And WFG Test Problems (“+”–Win, “≈”–Tie, “–”–Loss)

| #     | M  | NSGA-III <sub>1</sub> * | NSGA-III <sub>2</sub> * | NSGA-III <sub>3</sub> * | NSGA-III <sub>4</sub> * | NSGA-III <sub>5</sub> * |
|-------|----|-------------------------|-------------------------|-------------------------|-------------------------|-------------------------|
| DTLZ1 | 2  | 5.82E-1(1.75E-4)        | 5.83E-1(5.40E-5)        | 5.82E-1(1.42E-4)≈       | 5.83E-1(9.73E-5)        | 5.82E-1(1.83E-4)≈       |
|       | 4  | 9.45E-1(1.73E-4)        | 9.45E-1(2.41E-4)≈       | 9.45E-1(3.07E-4)≈       | 9.45E-1(2.63E-4)≈       | 9.45E-1(2.47E-4)≈       |
|       | 6  | 9.90E-1(3.95E-3)        | 9.90E-1(1.13E-4)≈       | 9.89E-1(5.41E-3)≈       | 9.90E-1(1.05E-4)≈       | 9.90E-1(8.37E-5)≈       |
|       | 8  | 9.85E-1(6.71E-2)        | 9.97E-1(1.14E-3)≈       | 9.98E-1(6.72E-5)≈       | 9.97E-1(1.76E-3)≈       | 9.98E-1(5.02E-4)≈       |
|       | 10 | 9.96E-1(1.91E-2)        | 9.97E-1(1.49E-2)≈       | 9.96E-1(1.67E-2)≈       | 1.00E+0(2.62E-4)≈       | 1.00E+0(2.26E-4)≈       |
| DTLZ2 | 2  | 3.47E-1(6.33E-7)        | 3.47E-1(1.33E-7)≈       | 3.47E-1(2.01E-7)≈       | 3.47E-1(4.83E-7)≈       | 3.47E-1(8.51E-8)≈       |
|       | 4  | 7.15E-1(4.85E-4)        | 7.15E-1(4.62E-4)≈       | 7.15E-1(3.97E-4)        | 7.15E-1(3.47E-4)≈       | 7.15E-1(4.04E-4)        |
|       | 6  | 8.61E-1(3.63E-4)        | 8.61E-1(4.42E-4)≈       | 8.61E-1(3.99E-4)≈       | 8.61E-1(3.77E-4)≈       | 8.61E-1(3.07E-4)≈       |
|       | 8  | 9.21E-1(2.60E-2)        | 9.17E-1(2.53E-2)≈       | 9.26E-1(3.19E-4)≈       | 9.21E-1(1.77E-2)≈       | 9.25E-1(5.71E-3)≈       |
|       | 10 | 9.66E-1(1.23E-2)        | 9.66E-1(1.17E-2)≈       | 9.59E-1(2.02E-2)+       | 9.64E-1(1.42E-2)≈       | 9.62E-1(1.76E-2)≈       |
| DTLZ3 | 2  | 3.45E-1(1.46E-3)        | 3.46E-1(1.08E-3)≈       | 3.46E-1(1.11E-3)≈       | 3.46E-1(7.35E-4)        | 3.46E-1(9.63E-4)        |
|       | 4  | 7.13E-1(2.05E-3)        | 7.14E-1(1.32E-3)≈       | 7.13E-1(1.35E-3)≈       | 7.14E-1(1.59E-3)≈       | 7.13E-1(1.94E-3)≈       |
|       | 6  | 8.57E-1(3.03E-3)        | 8.56E-1(3.34E-3)≈       | 8.57E-1(2.33E-3)≈       | 8.57E-1(3.02E-3)≈       | 8.57E-1(3.53E-3)≈       |
|       | 8  | 9.13E-1(5.09E-2)        | 9.23E-1(1.83E-3)≈       | 9.02E-1(8.18E-2)≈       | 9.23E-1(2.54E-3)≈       | 9.23E-1(1.97E-3)≈       |
|       | 10 | 9.38E-1(6.96E-2)        | 9.67E-1(5.85E-3)        | 9.48E-1(4.46E-2)≈       | 9.03E-1(1.67E-1)≈       | 9.24E-1(9.38E-2)≈       |
| DTLZ4 | 2  | 3.47E-1(1.53E-5)        | 3.47E-1(1.20E-4)+       | 3.47E-1(1.06E-5)≈       | 3.47E-1(5.33E-5)≈       | 3.47E-1(4.39E-6)≈       |
|       | 4  | 7.10E-1(2.87E-2)        | 6.89E-1(6.09E-2)+       | 7.04E-1(4.04E-2)≈       | 7.15E-1(4.98E-4)≈       | 6.94E-1(5.59E-2)≈       |
|       | 6  | 8.61E-1(3.89E-4)        | 8.51E-1(3.20E-2)+       | 8.61E-1(3.15E-4)≈       | 8.53E-1(3.12E-2)≈       | 8.61E-1(4.53E-4)≈       |
|       | 8  | 9.20E-1(2.69E-2)        | 9.12E-1(3.05E-2)≈       | 9.17E-1(2.52E-2)≈       | 9.26E-1(2.68E-4)≈       | 9.24E-1(8.55E-3)≈       |
|       | 10 | 9.67E-1(1.17E-2)        | 9.66E-1(1.08E-2)≈       | 9.64E-1(1.38E-2)≈       | 9.66E-1(1.29E-2)≈       | 9.68E-1(8.98E-3)≈       |
| DTLZ5 | 2  | 3.47E-1(5.99E-7)        | 3.47E-1(7.05E-7)≈       | 3.47E-1(4.99E-8)≈       | 3.47E-1(4.55E-8)≈       | 3.47E-1(9.57E-8)≈       |
|       | 4  | 1.40E-1(3.64E-3)        | 1.40E-1(2.10E-3)≈       | 1.41E-1(2.38E-3)≈       | 1.40E-1(2.32E-3)≈       | 1.41E-1(2.10E-3)≈       |
|       | 6  | 9.59E-2(1.07E-2)        | 9.75E-2(4.12E-3)≈       | 9.88E-2(3.82E-3)≈       | 9.70E-2(5.24E-3)≈       | 9.86E-2(2.67E-3)≈       |
|       | 8  | 9.16E-2(2.09E-3)        | 9.21E-2(2.27E-3)≈       | 9.20E-2(2.38E-3)≈       | 9.21E-2(2.62E-3)≈       | 9.13E-2(2.25E-3)≈       |
|       | 10 | 8.90E-2(2.31E-3)        | 8.62E-2(5.54E-3)+       | 8.92E-2(2.71E-3)≈       | 8.83E-2(3.04E-3)≈       | 8.74E-2(3.65E-3)+       |
| DTLZ6 | 2  | 3.47E-1(4.71E-8)        | 3.47E-1(4.08E-8)≈       | 3.47E-1(2.69E-8)≈       | 3.47E-1(4.68E-8)≈       | 3.47E-1(3.98E-8)≈       |
|       | 4  | 1.36E-1(3.63E-3)        | 1.33E-1(1.03E-2)≈       | 1.35E-1(6.91E-3)≈       | 1.35E-1(5.32E-3)≈       | 1.32E-1(9.32E-3)+       |
|       | 6  | 9.13E-2(1.34E-3)        | 9.21E-2(2.91E-3)≈       | 9.14E-2(1.73E-3)≈       | 9.15E-2(1.99E-3)≈       | 9.12E-2(1.30E-3)≈       |
|       | 8  | 9.11E-2(8.75E-4)        | 9.11E-2(5.32E-4)≈       | 9.11E-2(8.47E-4)≈       | 9.10E-2(5.71E-4)≈       | 9.11E-2(5.17E-4)≈       |
|       | 10 | 9.09E-2(2.24E-4)        | 9.09E-2(2.07E-4)≈       | 9.09E-2(2.81E-4)≈       | 9.10E-2(3.17E-4)≈       | 8.63E-2(1.82E-2)≈       |
| DTLZ7 | 2  | 2.43E-1(2.07E-5)        | 2.43E-1(1.87E-5)≈       | 2.43E-1(1.96E-5)≈       | 2.43E-1(1.29E-5)≈       | 2.43E-1(1.46E-5)≈       |
|       | 4  | 2.58E-1(3.82E-3)        | 2.58E-1(5.50E-3)≈       | 2.58E-1(3.86E-3)≈       | 2.57E-1(5.59E-3)≈       | 2.59E-1(5.89E-3)≈       |
|       | 6  | 2.30E-1(2.84E-3)        | 2.31E-1(2.74E-3)≈       | 2.31E-1(2.48E-3)≈       | 2.31E-1(2.68E-3)≈       | 2.30E-1(2.50E-3)≈       |
|       | 8  | 2.12E-1(2.36E-3)        | 2.12E-1(2.94E-3)≈       | 2.13E-1(2.58E-3)≈       | 2.13E-1(2.75E-3)≈       | 2.12E-1(2.84E-3)≈       |
|       | 10 | 1.82E-1(7.54E-3)        | 1.81E-1(7.78E-3)≈       | 1.80E-1(7.46E-3)≈       | 1.82E-1(7.56E-3)≈       | 1.85E-1(7.92E-3)≈       |
| WFG1  | 2  | 6.73E-1(8.85E-3)        | 6.77E-1(5.95E-3)        | 6.73E-1(1.17E-2)≈       | 6.77E-1(6.99E-3)        | 6.69E-1(2.10E-2)≈       |
|       | 4  | 9.83E-1(9.86E-3)        | 9.84E-1(8.16E-3)≈       | 9.83E-1(8.62E-3)≈       | 9.82E-1(9.63E-3)≈       | 9.82E-1(1.09E-2)≈       |
|       | 6  | 8.59E-1(2.95E-2)        | 8.70E-1(2.21E-2)≈       | 8.62E-1(2.30E-2)≈       | 8.58E-1(2.14E-2)≈       | 8.41E-1(2.61E-2)+       |
|       | 8  | 9.89E-1(1.95E-2)        | 9.83E-1(2.32E-2)≈       | 9.93E-1(1.06E-2)≈       | 9.83E-1(2.61E-2)≈       | 9.85E-1(2.82E-2)≈       |
|       | 10 | 9.99E-1(3.07E-4)        | 9.99E-1(6.37E-4)+       | 9.99E-1(3.06E-4)≈       | 9.99E-1(5.31E-4)≈       | 9.99E-1(3.94E-4)+       |
| WFG2  | 2  | 6.32E-1(3.13E-4)        | 6.32E-1(3.82E-4)+       | 6.32E-1(4.89E-4)+       | 6.32E-1(4.81E-4)+       | 6.32E-1(3.20E-4)+       |
|       | 4  | 9.88E-1(6.01E-4)        | 9.88E-1(4.99E-4)≈       | 9.88E-1(4.14E-4)≈       | 9.88E-1(4.40E-4)≈       | 9.88E-1(3.87E-4)≈       |
|       | 6  | 9.95E-1(9.23E-4)        | 9.95E-1(9.24E-4)≈       | 9.95E-1(8.78E-4)≈       | 9.95E-1(8.58E-4)≈       | 9.95E-1(8.78E-4)≈       |
|       | 8  | 9.96E-1(1.12E-3)        | 9.96E-1(1.11E-3)≈       | 9.97E-1(1.07E-3)        | 9.96E-1(1.54E-3)≈       | 9.97E-1(1.13E-3)≈       |
|       | 10 | 9.98E-1(9.61E-4)        | 9.97E-1(1.09E-3)≈       | 9.97E-1(1.19E-3)≈       | 9.97E-1(9.06E-4)+       | 9.97E-1(1.54E-3)≈       |
| WFG3  | 2  | 5.82E-1(2.48E-4)        | 5.82E-1(2.75E-4)≈       | 5.82E-1(2.14E-4)≈       | 5.82E-1(2.12E-4)≈       | 5.82E-1(2.22E-4)        |
|       | 4  | 2.55E-1(7.27E-3)        | 2.56E-1(9.22E-3)≈       | 2.55E-1(6.04E-3)≈       | 2.55E-1(6.72E-3)≈       | 2.55E-1(8.01E-3)≈       |
|       | 6  | 5.04E-2(2.00E-2)        | 5.37E-2(1.83E-2)≈       | 5.04E-2(2.58E-2)≈       | 4.70E-2(1.82E-2)≈       | 5.44E-2(2.01E-2)≈       |
|       | 8  | 2.95E-2(1.56E-2)        | 3.62E-2(1.85E-2)≈       | 2.39E-2(1.93E-2)≈       | 2.08E-2(1.43E-2)+       | 2.33E-2(1.79E-2)≈       |
|       | 10 | 8.98E-3(9.60E-3)        | 1.93E-2(8.65E-3)        | 5.58E-4(1.08E-3)+       | 2.68E-3(8.51E-3)+       | 3.06E-3(7.07E-3)+       |
| WFG4  | 2  | 3.47E-1(3.93E-5)        | 3.47E-1(4.10E-5)≈       | 3.47E-1(5.41E-5)≈       | 3.47E-1(4.39E-5)≈       | 3.47E-1(5.02E-5)≈       |
|       | 4  | 7.11E-1(9.16E-4)        | 7.12E-1(6.59E-4)≈       | 7.11E-1(9.85E-4)≈       | 7.11E-1(9.62E-4)≈       | 7.11E-1(9.10E-4)≈       |
|       | 6  | 8.48E-1(2.03E-3)        | 8.48E-1(1.21E-3)≈       | 8.45E-1(1.74E-2)≈       | 8.45E-1(1.72E-2)≈       | 8.47E-1(1.53E-3)≈       |
|       | 8  | 9.12E-1(2.57E-3)        | 9.07E-1(2.21E-2)≈       | 9.08E-1(1.59E-2)≈       | 9.12E-1(1.41E-3)≈       | 9.13E-1(2.42E-3)≈       |
|       | 10 | 9.61E-1(1.72E-3)        | 9.60E-1(2.80E-3)≈       | 9.61E-1(1.78E-3)≈       | 9.60E-1(6.68E-3)≈       | 9.61E-1(1.37E-3)≈       |
| WFG5  | 2  | 3.13E-1(5.99E-5)        | 3.13E-1(2.95E-5)≈       | 3.13E-1(6.27E-5)≈       | 3.13E-1(1.00E-3)≈       | 3.13E-1(1.26E-5)        |
|       | 4  | 6.68E-1(5.20E-4)        | 6.69E-1(4.72E-4)        | 6.69E-1(5.11E-4)        | 6.69E-1(5.48E-4)        | 6.69E-1(4.63E-4)        |
|       | 6  | 8.06E-1(4.40E-4)        | 8.05E-1(4.21E-4)≈       | 8.06E-1(3.87E-4)≈       | 8.06E-1(4.44E-4)≈       | 8.06E-1(4.48E-4)≈       |
|       | 8  | 8.63E-1(6.86E-4)        | 8.63E-1(4.66E-4)≈       | 8.63E-1(6.30E-4)≈       | 8.63E-1(7.01E-4)≈       | 8.63E-1(8.25E-4)≈       |
|       | 10 | 9.04E-1(3.44E-4)        | 9.04E-1(2.35E-4)≈       | 9.04E-1(2.72E-4)≈       | 9.03E-1(3.27E-4)≈       | 9.04E-1(3.25E-4)        |
| WFG6  | 2  | 3.08E-1(8.20E-3)        | 3.07E-1(5.28E-3)≈       | 3.08E-1(6.81E-3)≈       | 3.11E-1(6.92E-3)≈       | 3.09E-1(7.33E-3)≈       |
|       | 4  | 6.61E-1(8.37E-3)        | 6.61E-1(8.38E-3)≈       | 6.60E-1(7.44E-3)≈       | 6.59E-1(8.78E-3)≈       | 6.58E-1(7.74E-3)≈       |
|       | 6  | 7.99E-1(6.00E-3)        | 7.98E-1(9.34E-3)≈       | 7.93E-1(8.70E-3)+       | 7.96E-1(9.48E-3)≈       | 7.93E-1(1.01E-2)+       |
|       | 8  | 8.41E-1(1.58E-2)        | 8.39E-1(1.86E-2)≈       | 8.38E-1(1.85E-2)≈       | 8.41E-1(1.71E-2)≈       | 8.41E-1(1.79E-2)≈       |
|       | 10 | 8.78E-1(1.54E-2)        | 8.75E-1(2.12E-2)≈       | 8.84E-1(1.39E-2)≈       | 8.78E-1(1.50E-2)≈       | 8.85E-1(1.63E-2)        |

**Table S1**  
(Continue)

|      |    |                  |                   |                   |                   |                   |
|------|----|------------------|-------------------|-------------------|-------------------|-------------------|
| WFG7 | 2  | 3.47E-1(2.04E-5) | 3.47E-1(1.98E-5)≈ | 3.47E-1(1.74E-5)≈ | 3.47E-1(1.75E-5)≈ | 3.47E-1(2.05E-5)≈ |
|      | 4  | 7.12E-1(5.96E-4) | 7.12E-1(6.03E-4)≈ | 7.12E-1(5.59E-4)≈ | 7.12E-1(7.24E-4)≈ | 7.12E-1(5.90E-4)≈ |
|      | 6  | 8.55E-1(8.20E-4) | 8.55E-1(9.75E-4)+ | 8.55E-1(7.27E-4)≈ | 8.55E-1(8.41E-4)≈ | 8.55E-1(6.42E-4)≈ |
|      | 8  | 9.17E-1(1.09E-3) | 9.17E-1(1.20E-3)≈ | 9.17E-1(1.06E-3)≈ | 9.14E-1(1.61E-2)≈ | 9.16E-1(7.31E-3)≈ |
|      | 10 | 9.58E-1(1.54E-2) | 9.62E-1(1.16E-2)≈ | 9.61E-1(1.22E-2)≈ | 9.62E-1(1.13E-2)≈ | 9.61E-1(1.39E-2)≈ |
| WFG8 | 2  | 3.03E-1(4.43E-4) | 3.02E-1(4.46E-4)≈ | 3.03E-1(5.61E-4)≈ | 3.03E-1(5.29E-4)≈ | 3.03E-1(4.80E-4)≈ |
|      | 4  | 6.34E-1(1.70E-3) | 6.35E-1(9.54E-4)≈ | 6.35E-1(8.40E-4)≈ | 6.34E-1(2.61E-3)≈ | 6.34E-1(9.33E-4)≈ |
|      | 6  | 7.67E-1(1.95E-3) | 7.68E-1(1.54E-3)- | 7.64E-1(1.88E-2)≈ | 7.67E-1(1.63E-3)≈ | 7.67E-1(1.88E-3)≈ |
|      | 8  | 7.84E-1(2.74E-2) | 7.84E-1(2.39E-2)≈ | 7.84E-1(2.76E-2)≈ | 7.85E-1(2.46E-2)≈ | 7.82E-1(2.32E-2)≈ |
|      | 10 | 8.68E-1(1.81E-2) | 8.62E-1(1.41E-2)≈ | 8.64E-1(1.67E-2)≈ | 8.65E-1(1.60E-2)≈ | 8.64E-1(1.83E-2)≈ |
| WFG9 | 2  | 3.39E-1(1.67E-2) | 3.40E-1(1.67E-2)≈ | 3.40E-1(1.68E-2)≈ | 3.40E-1(1.67E-2)≈ | 3.43E-1(9.86E-4)≈ |
|      | 4  | 6.77E-1(3.22E-3) | 6.77E-1(3.05E-3)≈ | 6.76E-1(3.38E-3)≈ | 6.76E-1(3.44E-3)≈ | 6.75E-1(2.84E-3)+ |
|      | 6  | 7.82E-1(2.70E-2) | 7.92E-1(1.68E-2)- | 7.81E-1(3.07E-2)≈ | 7.91E-1(1.66E-2)≈ | 7.91E-1(1.55E-2)≈ |
|      | 8  | 8.20E-1(6.04E-2) | 8.49E-1(9.47E-3)- | 8.28E-1(4.89E-2)≈ | 8.31E-1(4.92E-2)≈ | 8.11E-1(6.70E-2)≈ |
|      | 10 | 8.76E-1(5.84E-2) | 8.99E-1(8.01E-3)- | 8.68E-1(6.04E-2)≈ | 8.83E-1(4.57E-2)≈ | 8.85E-1(4.24E-2)≈ |
|      |    | W/L/T            | 7/9/64            | 4/3/73            | 4/4/72            | 8/7/65            |

**Table S2**  
Comparison of HV and Statistical Results on DTLZ And WFG Test Problems (“+”-Win, “≈”-Tie, “-”-Loss)

| #     | M  | NSGA-III <sub>2</sub> * | NSGA-III <sub>1</sub> * | NSGA-III <sub>3</sub> * | NSGA-III <sub>4</sub> * | NSGA-III <sub>5</sub> * |
|-------|----|-------------------------|-------------------------|-------------------------|-------------------------|-------------------------|
| DTLZ1 | 2  | 5.83E-1(5.40E-5)        | 5.82E-1(1.75E-4)+       | 5.82E-1(1.42E-4)+       | 5.83E-1(9.73E-5)≈       | 5.82E-1(1.83E-4)≈       |
|       | 4  | 9.45E-1(2.41E-4)        | 9.45E-1(1.73E-4)≈       | 9.45E-1(3.07E-4)≈       | 9.45E-1(2.63E-4)≈       | 9.45E-1(2.47E-4)≈       |
|       | 6  | 9.90E-1(1.13E-4)        | 9.90E-1(3.95E-3)≈       | 9.89E-1(5.41E-3)≈       | 9.90E-1(1.05E-4)≈       | 9.90E-1(8.37E-5)≈       |
|       | 8  | 9.97E-1(1.14E-3)        | 9.85E-1(6.71E-2)≈       | 9.98E-1(6.72E-5)-       | 9.97E-1(1.76E-3)≈       | 9.98E-1(5.02E-4)≈       |
|       | 10 | 9.97E-1(1.49E-2)        | 9.96E-1(1.91E-2)≈       | 9.96E-1(1.67E-2)≈       | 1.00E+0(2.62E-4)≈       | 1.00E+0(2.26E-4)≈       |
| DTLZ2 | 2  | 3.47E-1(1.33E-7)        | 3.47E-1(6.33E-7)≈       | 3.47E-1(2.01E-7)≈       | 3.47E-1(4.83E-7)≈       | 3.47E-1(8.51E-8)≈       |
|       | 4  | 7.15E-1(4.62E-4)        | 7.15E-1(4.85E-4)≈       | 7.15E-1(3.97E-4)≈       | 7.15E-1(3.47E-4)≈       | 7.15E-1(4.04E-4)≈       |
|       | 6  | 8.61E-1(4.42E-4)        | 8.61E-1(3.63E-4)≈       | 8.61E-1(3.99E-4)≈       | 8.61E-1(3.77E-4)≈       | 8.61E-1(3.07E-4)≈       |
|       | 8  | 9.17E-1(2.53E-2)        | 9.21E-1(2.60E-2)≈       | 9.26E-1(3.19E-4)-       | 9.21E-1(1.77E-2)≈       | 9.25E-1(5.71E-3)≈       |
|       | 10 | 9.66E-1(1.17E-2)        | 9.66E-1(1.23E-2)≈       | 9.59E-1(2.02E-2)≈       | 9.64E-1(1.42E-2)≈       | 9.62E-1(1.76E-2)≈       |
| DTLZ3 | 2  | 3.46E-1(1.08E-3)        | 3.45E-1(1.46E-3)≈       | 3.46E-1(1.11E-3)≈       | 3.46E-1(7.35E-4)-       | 3.46E-1(9.63E-4)≈       |
|       | 4  | 7.14E-1(1.32E-3)        | 7.13E-1(2.05E-3)≈       | 7.13E-1(1.35E-3)≈       | 7.14E-1(1.59E-3)≈       | 7.13E-1(1.94E-3)≈       |
|       | 6  | 8.56E-1(3.34E-3)        | 8.57E-1(3.03E-3)≈       | 8.57E-1(2.33E-3)≈       | 8.57E-1(3.02E-3)≈       | 8.57E-1(3.53E-3)≈       |
|       | 8  | 9.23E-1(1.83E-3)        | 9.13E-1(5.09E-2)≈       | 9.02E-1(8.18E-2)≈       | 9.23E-1(2.54E-3)≈       | 9.23E-1(1.97E-3)≈       |
|       | 10 | 9.67E-1(5.85E-3)        | 9.38E-1(6.96E-2)+       | 9.48E-1(4.46E-2)+       | 9.03E-1(1.67E-1)+       | 9.24E-1(9.38E-2)+       |
| DTLZ4 | 2  | 3.47E-1(1.20E-4)        | 3.47E-1(1.53E-5)-       | 3.47E-1(1.06E-5)-       | 3.47E-1(5.33E-5)≈       | 3.47E-1(4.39E-6)-       |
|       | 4  | 6.89E-1(6.09E-2)        | 7.10E-1(2.87E-2)-       | 7.04E-1(4.04E-2)≈       | 7.15E-1(4.98E-4)-       | 6.94E-1(5.59E-2)≈       |
|       | 6  | 8.51E-1(3.20E-2)        | 8.61E-1(3.89E-4)-       | 8.61E-1(3.15E-4)-       | 8.53E-1(3.12E-2)≈       | 8.61E-1(4.53E-4)-       |
|       | 8  | 9.12E-1(3.05E-2)        | 9.20E-1(2.69E-2)≈       | 9.17E-1(2.52E-2)≈       | 9.26E-1(2.68E-4)-       | 9.24E-1(8.55E-3)-       |
|       | 10 | 9.66E-1(1.08E-2)        | 9.67E-1(1.17E-2)≈       | 9.64E-1(1.38E-2)≈       | 9.66E-1(1.29E-2)≈       | 9.68E-1(8.98E-3)≈       |
| DTLZ5 | 2  | 3.47E-1(7.05E-7)        | 3.47E-1(5.99E-7)≈       | 3.47E-1(4.99E-8)-       | 3.47E-1(4.55E-8)-       | 3.47E-1(9.57E-8)≈       |
|       | 4  | 1.40E-1(2.10E-3)        | 1.40E-1(3.64E-3)≈       | 1.41E-1(2.38E-3)≈       | 1.40E-1(2.32E-3)≈       | 1.41E-1(2.10E-3)≈       |
|       | 6  | 9.75E-2(4.12E-3)        | 9.59E-2(1.07E-2)≈       | 9.88E-2(3.82E-3)≈       | 9.70E-2(5.24E-3)≈       | 9.86E-2(2.67E-3)≈       |
|       | 8  | 9.21E-2(2.27E-3)        | 9.16E-2(2.09E-3)≈       | 9.20E-2(2.38E-3)≈       | 9.21E-2(2.62E-3)≈       | 9.13E-2(2.25E-3)≈       |
|       | 10 | 8.62E-2(5.54E-3)        | 8.90E-2(2.31E-3)-       | 8.92E-2(2.71E-3)-       | 8.83E-2(3.04E-3)-       | 8.74E-2(3.65E-3)≈       |
| DTLZ6 | 2  | 3.47E-1(4.08E-8)        | 3.47E-1(4.71E-8)≈       | 3.47E-1(2.69E-8)≈       | 3.47E-1(4.68E-8)≈       | 3.47E-1(3.98E-8)≈       |
|       | 4  | 1.33E-1(1.03E-2)        | 1.36E-1(3.63E-3)≈       | 1.35E-1(6.91E-3)≈       | 1.35E-1(5.32E-3)≈       | 1.32E-1(9.32E-3)≈       |
|       | 6  | 9.21E-2(2.91E-3)        | 9.13E-2(1.34E-3)≈       | 9.14E-2(1.73E-3)≈       | 9.15E-2(1.99E-3)≈       | 9.12E-2(1.30E-3)≈       |
|       | 8  | 9.11E-2(5.32E-4)        | 9.11E-2(8.75E-4)≈       | 9.11E-2(8.47E-4)≈       | 9.10E-2(5.71E-4)≈       | 9.11E-2(5.17E-4)≈       |
|       | 10 | 9.09E-2(2.07E-4)        | 9.09E-2(2.24E-4)≈       | 9.09E-2(2.81E-4)≈       | 9.10E-2(3.17E-4)≈       | 8.63E-2(1.82E-2)≈       |
| DTLZ7 | 2  | 2.43E-1(1.87E-5)        | 2.43E-1(2.07E-5)≈       | 2.43E-1(1.96E-5)≈       | 2.43E-1(1.29E-5)≈       | 2.43E-1(1.46E-5)≈       |
|       | 4  | 2.58E-1(5.50E-3)        | 2.58E-1(3.82E-3)≈       | 2.58E-1(3.86E-3)≈       | 2.57E-1(5.59E-3)≈       | 2.59E-1(5.89E-3)≈       |
|       | 6  | 2.31E-1(2.74E-3)        | 2.30E-1(2.84E-3)≈       | 2.31E-1(2.48E-3)≈       | 2.31E-1(2.68E-3)≈       | 2.30E-1(2.50E-3)≈       |
|       | 8  | 2.12E-1(2.94E-3)        | 2.12E-1(2.36E-3)≈       | 2.13E-1(2.58E-3)≈       | 2.13E-1(2.75E-3)≈       | 2.12E-1(2.84E-3)≈       |
|       | 10 | 1.81E-1(7.78E-3)        | 1.82E-1(7.54E-3)≈       | 1.80E-1(7.46E-3)≈       | 1.82E-1(7.56E-3)≈       | 1.85E-1(7.92E-3)≈       |
| WFG1  | 2  | 6.77E-1(5.95E-3)        | 6.73E-1(8.85E-3)+       | 6.73E-1(1.17E-2)+       | 6.77E-1(6.99E-3)≈       | 6.69E-1(2.10E-2)+       |
|       | 4  | 9.84E-1(8.16E-3)        | 9.83E-1(9.86E-3)≈       | 9.83E-1(8.62E-3)≈       | 9.82E-1(9.63E-3)≈       | 9.82E-1(1.09E-2)≈       |
|       | 6  | 8.70E-1(2.21E-2)        | 8.59E-1(2.95E-2)+       | 8.62E-1(2.30E-2)≈       | 8.58E-1(2.14E-2)+       | 8.41E-1(2.61E-2)+       |
|       | 8  | 9.83E-1(2.32E-2)        | 9.89E-1(1.95E-2)≈       | 9.93E-1(1.06E-2)-       | 9.83E-1(2.61E-2)≈       | 9.85E-1(2.82E-2)≈       |
|       | 10 | 9.99E-1(6.37E-4)        | 9.99E-1(3.07E-4)-       | 9.99E-1(3.30E-4)≈       | 9.99E-1(5.31E-4)≈       | 9.99E-1(3.94E-4)≈       |
| WFG2  | 2  | 6.32E-1(3.82E-4)        | 6.32E-1(3.13E-4)-       | 6.32E-1(4.89E-4)≈       | 6.32E-1(4.81E-4)+       | 6.32E-1(3.20E-4)≈       |
|       | 4  | 9.88E-1(4.99E-4)        | 9.88E-1(6.01E-4)≈       | 9.88E-1(4.14E-4)≈       | 9.88E-1(4.40E-4)≈       | 9.88E-1(3.87E-4)≈       |
|       | 6  | 9.95E-1(9.24E-4)        | 9.95E-1(9.23E-4)≈       | 9.95E-1(8.78E-4)≈       | 9.95E-1(8.58E-4)≈       | 9.95E-1(8.78E-4)≈       |
|       | 8  | 9.96E-1(1.11E-3)        | 9.96E-1(1.12E-3)≈       | 9.97E-1(1.07E-3)-       | 9.96E-1(1.54E-3)≈       | 9.97E-1(1.13E-3)≈       |
|       | 10 | 9.97E-1(1.09E-3)        | 9.98E-1(9.61E-4)≈       | 9.97E-1(1.19E-3)≈       | 9.97E-1(9.06E-4)≈       | 9.97E-1(1.54E-3)≈       |

**Table S2**  
(Continue)

|       |    |                  |                   |                   |                   |                   |
|-------|----|------------------|-------------------|-------------------|-------------------|-------------------|
| WFG3  | 2  | 5.82E-1(2.75E-4) | 5.82E-1(2.48E-4)≈ | 5.82E-1(2.14E-4)≈ | 5.82E-1(2.12E-4)≈ | 5.82E-1(2.22E-4)≈ |
|       | 4  | 2.56E-1(9.22E-3) | 2.55E-1(7.27E-3)≈ | 2.55E-1(6.04E-3)≈ | 2.55E-1(6.72E-3)≈ | 2.55E-1(8.01E-3)≈ |
|       | 6  | 5.37E-2(1.83E-2) | 5.04E-2(2.00E-2)≈ | 5.04E-2(2.58E-2)≈ | 4.70E-2(1.82E-2)≈ | 5.44E-2(2.01E-2)≈ |
|       | 8  | 3.62E-2(1.85E-2) | 2.95E-2(1.56E-2)≈ | 2.39E-2(1.93E-2)+ | 2.08E-2(1.43E-2)+ | 2.33E-2(1.79E-2)+ |
|       | 10 | 1.93E-2(8.65E-3) | 8.98E-3(9.60E-3)+ | 5.58E-4(1.08E-3)+ | 2.68E-3(8.51E-3)+ | 3.06E-3(7.07E-3)+ |
| WFG34 | 2  | 3.47E-1(4.10E-5) | 3.47E-1(3.93E-5)≈ | 3.47E-1(5.41E-5)+ | 3.47E-1(4.39E-5)+ | 3.47E-1(5.02E-5)≈ |
|       | 4  | 7.12E-1(6.59E-4) | 7.11E-1(9.16E-4)≈ | 7.11E-1(9.85E-4)≈ | 7.11E-1(9.62E-4)+ | 7.11E-1(9.10E-4)≈ |
|       | 6  | 8.48E-1(1.21E-3) | 8.48E-1(2.03E-3)≈ | 8.45E-1(1.74E-2)≈ | 8.45E-1(1.72E-2)≈ | 8.47E-1(1.53E-3)≈ |
|       | 8  | 9.07E-1(2.21E-2) | 9.12E-1(2.57E-3)≈ | 9.08E-1(1.59E-2)≈ | 9.12E-1(1.41E-3)≈ | 9.13E-1(2.42E-3)≈ |
|       | 10 | 9.60E-1(2.80E-3) | 9.61E-1(1.72E-3)≈ | 9.61E-1(1.78E-3)≈ | 9.60E-1(6.68E-3)≈ | 9.61E-1(1.37E-3)≈ |
| WFG5  | 2  | 3.13E-1(2.95E-5) | 3.13E-1(5.99E-5)≈ | 3.13E-1(6.27E-5)≈ | 3.13E-1(1.00E-3)≈ | 3.13E-1(1.26E-5)≈ |
|       | 4  | 6.69E-1(4.72E-4) | 6.68E-1(5.20E-4)+ | 6.69E-1(5.11E-4)≈ | 6.69E-1(5.48E-4)≈ | 6.69E-1(4.63E-4)≈ |
|       | 6  | 8.05E-1(4.21E-4) | 8.06E-1(4.40E-4)≈ | 8.06E-1(3.87E-4)≈ | 8.06E-1(4.44E-4)≈ | 8.06E-1(4.48E-4)≈ |
|       | 8  | 8.63E-1(4.66E-4) | 8.63E-1(6.86E-4)≈ | 8.63E-1(6.30E-4)≈ | 8.63E-1(7.01E-4)≈ | 8.63E-1(8.25E-4)≈ |
|       | 10 | 9.04E-1(2.35E-4) | 9.04E-1(3.44E-4)≈ | 9.04E-1(2.72E-4)≈ | 9.03E-1(3.27E-4)≈ | 9.04E-1(3.25E-4)- |
| WFG6  | 2  | 3.07E-1(5.28E-3) | 3.08E-1(8.20E-3)≈ | 3.08E-1(6.81E-3)≈ | 3.11E-1(6.92E-3)≈ | 3.09E-1(7.33E-3)≈ |
|       | 4  | 6.61E-1(8.38E-3) | 6.61E-1(8.37E-3)≈ | 6.60E-1(7.44E-3)≈ | 6.59E-1(8.78E-3)≈ | 6.58E-1(7.74E-3)≈ |
|       | 6  | 7.98E-1(9.34E-3) | 7.99E-1(6.00E-3)≈ | 7.93E-1(8.70E-3)+ | 7.96E-1(9.48E-3)≈ | 7.93E-1(1.01E-2)+ |
|       | 8  | 8.39E-1(1.86E-2) | 8.41E-1(1.58E-2)≈ | 8.38E-1(1.85E-2)≈ | 8.41E-1(1.71E-2)≈ | 8.41E-1(1.79E-2)≈ |
|       | 10 | 8.75E-1(2.12E-2) | 8.78E-1(1.54E-2)≈ | 8.84E-1(1.39E-2)- | 8.78E-1(1.50E-2)≈ | 8.85E-1(1.63E-2)≈ |
| WFG7  | 2  | 3.47E-1(1.98E-5) | 3.47E-1(2.04E-5)≈ | 3.47E-1(1.74E-5)≈ | 3.47E-1(1.75E-5)≈ | 3.47E-1(2.05E-5)≈ |
|       | 4  | 7.12E-1(6.03E-4) | 7.12E-1(5.96E-4)≈ | 7.12E-1(5.59E-4)≈ | 7.12E-1(7.24E-4)≈ | 7.12E-1(5.90E-4)≈ |
|       | 6  | 8.55E-1(9.75E-4) | 8.55E-1(8.20E-4)- | 8.55E-1(7.27E-4)≈ | 8.55E-1(8.41E-4)≈ | 8.55E-1(6.42E-4)≈ |
|       | 8  | 9.17E-1(1.20E-3) | 9.17E-1(1.09E-3)≈ | 9.17E-1(1.06E-3)≈ | 9.14E-1(1.61E-2)≈ | 9.16E-1(7.31E-3)≈ |
|       | 10 | 9.62E-1(1.16E-2) | 9.58E-1(1.54E-2)≈ | 9.61E-1(1.22E-2)≈ | 9.62E-1(1.13E-2)≈ | 9.61E-1(1.39E-2)≈ |
| WFG8  | 2  | 3.02E-1(4.46E-4) | 3.03E-1(4.43E-4)≈ | 3.03E-1(5.61E-4)≈ | 3.03E-1(5.29E-4)≈ | 3.03E-1(4.80E-4)≈ |
|       | 4  | 6.35E-1(9.54E-4) | 6.34E-1(1.70E-3)≈ | 6.35E-1(8.40E-4)≈ | 6.34E-1(2.61E-3)≈ | 6.34E-1(9.33E-4)≈ |
|       | 6  | 7.68E-1(1.54E-3) | 7.67E-1(1.95E-3)+ | 7.64E-1(1.88E-2)≈ | 7.67E-1(1.63E-3)≈ | 7.67E-1(1.88E-3)≈ |
|       | 8  | 7.84E-1(2.39E-2) | 7.84E-1(2.74E-2)≈ | 7.84E-1(2.76E-2)≈ | 7.85E-1(2.46E-2)≈ | 7.82E-1(2.32E-2)≈ |
|       | 10 | 8.62E-1(1.41E-2) | 8.68E-1(1.81E-2)≈ | 8.64E-1(1.67E-2)≈ | 8.65E-1(1.60E-2)≈ | 8.64E-1(1.83E-2)≈ |
| WFG9  | 2  | 3.40E-1(1.67E-2) | 3.39E-1(1.67E-2)≈ | 3.40E-1(1.68E-2)≈ | 3.40E-1(1.67E-2)≈ | 3.43E-1(9.86E-4)≈ |
|       | 4  | 6.77E-1(3.05E-3) | 6.77E-1(3.22E-3)≈ | 6.76E-1(3.38E-3)+ | 6.76E-1(3.44E-3)≈ | 6.75E-1(2.84E-3)+ |
|       | 6  | 7.92E-1(1.68E-2) | 7.82E-1(2.70E-2)+ | 7.81E-1(3.07E-2)+ | 7.91E-1(1.66E-2)≈ | 7.91E-1(1.55E-2)≈ |
|       | 8  | 8.49E-1(9.47E-3) | 8.20E-1(6.04E-2)+ | 8.28E-1(4.89E-2)+ | 8.31E-1(4.92E-2)+ | 8.11E-1(6.70E-2)+ |
|       | 10 | 8.99E-1(8.01E-3) | 8.76E-1(5.84E-2)+ | 8.68E-1(6.04E-2)+ | 8.83E-1(4.57E-2)+ | 8.85E-1(4.24E-2)+ |
|       |    | <b>W/L/T</b>     | <b>10/7/63</b>    | <b>11/9/60</b>    | <b>9/5/66</b>     | <b>9/4/67</b>     |

**Table S3**  
Comparison of HV and Statistical Results on DTLZ And WFG Test Problems (“+”-Win, “≈”-Tie, “-”-Loss)

| #     | M  | NSGA-III <sub>3</sub> * | NSGA-III <sub>1</sub> * | NSGA-III <sub>2</sub> * | NSGA-III <sub>4</sub> * | NSGA-III <sub>5</sub> * |
|-------|----|-------------------------|-------------------------|-------------------------|-------------------------|-------------------------|
| DTLZ1 | 2  | 5.82E-1(1.42E-4)        | 5.82E-1(1.75E-4)≈       | 5.83E-1(5.40E-5)-       | 5.83E-1(9.73E-5)≈       | 5.82E-1(1.83E-4)≈       |
|       | 4  | 9.45E-1(3.07E-4)        | 9.45E-1(1.73E-4)≈       | 9.45E-1(2.41E-4)≈       | 9.45E-1(2.63E-4)≈       | 9.45E-1(2.47E-4)≈       |
|       | 6  | 9.89E-1(5.41E-3)        | 9.90E-1(3.95E-3)≈       | 9.90E-1(1.13E-4)≈       | 9.90E-1(1.05E-4)≈       | 9.90E-1(8.37E-5)≈       |
|       | 8  | 9.98E-1(6.72E-5)        | 9.85E-1(6.71E-2)≈       | 9.97E-1(1.14E-3)+       | 9.97E-1(1.76E-3)≈       | 9.98E-1(5.02E-4)≈       |
|       | 10 | 9.96E-1(1.67E-2)        | 9.96E-1(1.91E-2)≈       | 9.97E-1(1.49E-2)≈       | 1.00E+0(2.62E-4)≈       | 1.00E+0(2.26E-4)≈       |
| DTLZ2 | 2  | 3.47E-1(2.01E-7)        | 3.47E-1(6.33E-7)≈       | 3.47E-1(1.33E-7)≈       | 3.47E-1(4.83E-7)≈       | 3.47E-1(8.51E-8)≈       |
|       | 4  | 7.15E-1(3.97E-4)        | 7.15E-1(4.85E-4)+       | 7.15E-1(4.62E-4)≈       | 7.15E-1(3.47E-4)+       | 7.15E-1(4.04E-4)≈       |
|       | 6  | 8.61E-1(3.99E-4)        | 8.61E-1(3.63E-4)≈       | 8.61E-1(4.42E-4)≈       | 8.61E-1(3.77E-4)≈       | 8.61E-1(3.07E-4)≈       |
|       | 8  | 9.26E-1(3.19E-4)        | 9.21E-1(2.60E-2)≈       | 9.17E-1(2.53E-2)+       | 9.21E-1(1.77E-2)≈       | 9.25E-1(5.71E-3)≈       |
|       | 10 | 9.59E-1(2.02E-2)        | 9.66E-1(1.23E-2)-       | 9.66E-1(1.17E-2)≈       | 9.64E-1(1.42E-2)≈       | 9.62E-1(1.76E-2)≈       |
| DTLZ3 | 2  | 3.46E-1(1.11E-3)        | 3.45E-1(1.46E-3)≈       | 3.46E-1(1.08E-3)≈       | 3.46E-1(7.35E-4)-       | 3.46E-1(9.63E-4)≈       |
|       | 4  | 7.13E-1(1.35E-3)        | 7.13E-1(2.05E-3)≈       | 7.14E-1(1.32E-3)≈       | 7.14E-1(1.59E-3)≈       | 7.13E-1(1.94E-3)≈       |
|       | 6  | 8.57E-1(2.33E-3)        | 8.57E-1(3.03E-3)≈       | 8.56E-1(3.34E-3)≈       | 8.57E-1(3.02E-3)≈       | 8.57E-1(3.53E-3)≈       |
|       | 8  | 9.02E-1(8.18E-2)        | 9.13E-1(5.09E-2)≈       | 9.23E-1(1.83E-3)≈       | 9.23E-1(2.54E-3)≈       | 9.23E-1(1.97E-3)≈       |
|       | 10 | 9.48E-1(4.46E-2)        | 9.38E-1(6.96E-2)≈       | 9.67E-1(5.85E-3)≈       | 9.03E-1(1.67E-1)≈       | 9.24E-1(9.38E-2)≈       |
| DTLZ4 | 2  | 3.47E-1(1.06E-5)        | 3.47E-1(1.53E-5)≈       | 3.47E-1(1.20E-4)+       | 3.47E-1(5.33E-5)≈       | 3.47E-1(4.39E-6)≈       |
|       | 4  | 7.04E-1(4.04E-2)        | 7.10E-1(2.87E-2)≈       | 6.89E-1(6.09E-2)≈       | 7.15E-1(4.98E-4)≈       | 6.94E-1(5.59E-2)≈       |
|       | 6  | 8.61E-1(3.15E-4)        | 8.61E-1(3.89E-4)≈       | 8.51E-1(3.20E-2)+       | 8.53E-1(3.12E-2)≈       | 8.61E-1(4.53E-4)≈       |
|       | 8  | 9.17E-1(2.52E-2)        | 9.20E-1(2.69E-2)≈       | 9.12E-1(3.05E-2)≈       | 9.26E-1(2.68E-4)-       | 9.24E-1(8.55E-3)≈       |
|       | 10 | 9.64E-1(1.38E-2)        | 9.67E-1(1.17E-2)≈       | 9.66E-1(1.08E-2)≈       | 9.66E-1(1.29E-2)-       | 9.68E-1(8.98E-3)≈       |
| DTLZ5 | 2  | 3.47E-1(4.99E-8)        | 3.47E-1(5.99E-7)≈       | 3.47E-1(7.05E-7)+       | 3.47E-1(4.55E-8)≈       | 3.47E-1(9.57E-8)≈       |
|       | 4  | 1.41E-1(2.38E-3)        | 1.40E-1(3.64E-3)≈       | 1.40E-1(2.10E-3)≈       | 1.40E-1(2.32E-3)≈       | 1.41E-1(2.10E-3)≈       |
|       | 6  | 9.88E-2(3.82E-3)        | 9.59E-2(1.07E-2)≈       | 9.75E-2(4.12E-3)≈       | 9.70E-2(5.24E-3)≈       | 9.86E-2(2.67E-3)≈       |
|       | 8  | 9.20E-2(2.38E-3)        | 9.16E-2(2.09E-3)≈       | 9.21E-2(2.27E-3)≈       | 9.21E-2(2.62E-3)≈       | 9.13E-2(2.25E-3)≈       |
|       | 10 | 8.92E-2(2.71E-3)        | 8.90E-2(2.31E-3)≈       | 8.62E-2(5.54E-3)+       | 8.83E-2(3.04E-3)≈       | 8.74E-2(3.65E-3)+       |

**Table S3**  
(Continue)

|       |    |                  |                   |                   |                   |                   |
|-------|----|------------------|-------------------|-------------------|-------------------|-------------------|
| DTLZ7 | 2  | 2.43E-1(1.96E-5) | 2.43E-1(2.07E-5)≈ | 2.43E-1(1.87E-5)≈ | 2.43E-1(1.29E-5)≈ | 2.43E-1(1.46E-5)≈ |
|       | 4  | 2.58E-1(3.86E-3) | 2.58E-1(3.82E-3)≈ | 2.58E-1(5.50E-3)≈ | 2.57E-1(5.59E-3)≈ | 2.59E-1(5.89E-3)≈ |
|       | 6  | 2.31E-1(2.48E-3) | 2.30E-1(2.84E-3)≈ | 2.31E-1(2.74E-3)≈ | 2.31E-1(2.68E-3)≈ | 2.30E-1(2.50E-3)≈ |
|       | 8  | 2.13E-1(2.58E-3) | 2.12E-1(2.36E-3)≈ | 2.12E-1(2.94E-3)≈ | 2.13E-1(2.75E-3)≈ | 2.12E-1(2.84E-3)≈ |
|       | 10 | 1.80E-1(7.46E-3) | 1.82E-1(7.54E-3)≈ | 1.81E-1(7.78E-3)≈ | 1.82E-1(7.56E-3)≈ | 1.85E-1(7.92E-3)- |
| WFG1  | 2  | 6.73E-1(1.17E-2) | 6.73E-1(8.85E-3)≈ | 6.77E-1(5.95E-3)≈ | 6.77E-1(6.99E-3)- | 6.69E-1(2.10E-2)≈ |
|       | 4  | 9.83E-1(8.62E-3) | 9.83E-1(9.86E-3)≈ | 9.84E-1(8.16E-3)≈ | 9.82E-1(9.63E-3)≈ | 9.82E-1(1.09E-2)≈ |
|       | 6  | 8.62E-1(2.30E-2) | 8.59E-1(2.95E-2)≈ | 8.70E-1(2.21E-2)≈ | 8.58E-1(2.14E-2)≈ | 8.41E-1(2.61E-2)+ |
|       | 8  | 9.93E-1(1.06E-2) | 9.89E-1(1.95E-2)≈ | 9.83E-1(2.32E-2)+ | 9.83E-1(2.61E-2)+ | 9.85E-1(2.82E-2)≈ |
|       | 10 | 9.99E-1(3.30E-4) | 9.99E-1(3.07E-4)≈ | 9.99E-1(6.37E-4)+ | 9.99E-1(5.31E-4)≈ | 9.99E-1(3.94E-4)+ |
| WFG2  | 2  | 6.32E-1(4.89E-4) | 6.32E-1(3.13E-4)- | 6.32E-1(3.82E-4)≈ | 6.32E-1(4.81E-4)≈ | 6.32E-1(3.20E-4)≈ |
|       | 4  | 9.88E-1(4.14E-4) | 9.88E-1(6.01E-4)≈ | 9.88E-1(4.99E-4)≈ | 9.88E-1(4.40E-4)≈ | 9.88E-1(3.87E-4)≈ |
|       | 6  | 9.95E-1(8.78E-4) | 9.95E-1(9.23E-4)≈ | 9.95E-1(9.24E-4)≈ | 9.95E-1(8.58E-4)≈ | 9.95E-1(8.78E-4)≈ |
|       | 8  | 9.97E-1(1.07E-3) | 9.96E-1(1.12E-3)+ | 9.96E-1(1.11E-3)+ | 9.96E-1(1.54E-3)≈ | 9.97E-1(1.13E-3)≈ |
|       | 10 | 9.97E-1(1.19E-3) | 9.98E-1(9.61E-4)≈ | 9.97E-1(1.09E-3)≈ | 9.97E-1(9.06E-4)≈ | 9.97E-1(1.54E-3)≈ |
| WFG3  | 2  | 5.82E-1(2.14E-4) | 5.82E-1(2.48E-4)≈ | 5.82E-1(2.75E-4)≈ | 5.82E-1(2.12E-4)- | 5.82E-1(2.22E-4)- |
|       | 4  | 2.55E-1(6.04E-3) | 2.55E-1(7.27E-3)≈ | 2.56E-1(9.22E-3)≈ | 2.55E-1(6.72E-3)≈ | 2.55E-1(8.01E-3)≈ |
|       | 6  | 5.04E-2(2.58E-2) | 5.04E-2(2.00E-2)≈ | 5.37E-2(1.83E-2)≈ | 4.70E-2(1.82E-2)≈ | 5.44E-2(2.01E-2)≈ |
|       | 8  | 2.39E-2(1.93E-2) | 2.95E-2(1.56E-2)≈ | 3.62E-2(1.85E-2)- | 2.08E-2(1.43E-2)≈ | 2.33E-2(1.79E-2)≈ |
|       | 10 | 5.58E-4(1.08E-3) | 8.98E-3(9.60E-3)- | 1.93E-2(8.65E-3)- | 2.68E-3(8.51E-3)≈ | 3.06E-3(7.07E-3)- |
| WFG4  | 2  | 3.47E-1(5.41E-5) | 3.47E-1(3.93E-5)≈ | 3.47E-1(4.10E-5)- | 3.47E-1(4.39E-5)≈ | 3.47E-1(5.02E-5)≈ |
|       | 4  | 7.11E-1(9.85E-4) | 7.11E-1(9.16E-4)≈ | 7.12E-1(6.59E-4)≈ | 7.11E-1(9.62E-4)≈ | 7.11E-1(9.10E-4)≈ |
|       | 6  | 8.45E-1(1.74E-2) | 8.48E-1(2.03E-3)≈ | 8.48E-1(1.21E-3)≈ | 8.45E-1(1.72E-2)≈ | 8.47E-1(1.53E-3)≈ |
|       | 8  | 9.08E-1(1.59E-2) | 9.12E-1(2.57E-3)≈ | 9.07E-1(2.21E-2)≈ | 9.12E-1(1.41E-3)≈ | 9.13E-1(2.42E-3)≈ |
|       | 10 | 9.61E-1(1.78E-3) | 9.61E-1(1.72E-3)≈ | 9.60E-1(2.80E-3)≈ | 9.60E-1(6.68E-3)≈ | 9.61E-1(1.37E-3)≈ |
| WFG5  | 2  | 3.13E-1(6.27E-5) | 3.13E-1(5.99E-5)≈ | 3.13E-1(2.95E-5)≈ | 3.13E-1(1.00E-3)≈ | 3.13E-1(1.26E-5)≈ |
|       | 4  | 6.69E-1(5.11E-4) | 6.68E-1(5.20E-4)+ | 6.69E-1(4.72E-4)≈ | 6.69E-1(5.48E-4)≈ | 6.69E-1(4.63E-4)≈ |
|       | 6  | 8.06E-1(3.87E-4) | 8.06E-1(4.40E-4)≈ | 8.05E-1(4.21E-4)≈ | 8.06E-1(4.44E-4)≈ | 8.06E-1(4.48E-4)≈ |
|       | 8  | 8.63E-1(6.30E-4) | 8.63E-1(6.86E-4)≈ | 8.63E-1(4.66E-4)≈ | 8.63E-1(7.01E-4)≈ | 8.63E-1(8.25E-4)≈ |
|       | 10 | 9.04E-1(2.72E-4) | 9.04E-1(3.44E-4)≈ | 9.04E-1(2.35E-4)≈ | 9.03E-1(3.27E-4)≈ | 9.04E-1(3.25E-4)- |
| WFG6  | 2  | 3.08E-1(6.81E-3) | 3.08E-1(8.20E-3)≈ | 3.07E-1(5.28E-3)≈ | 3.11E-1(6.92E-3)≈ | 3.09E-1(7.33E-3)≈ |
|       | 4  | 6.60E-1(7.44E-3) | 6.61E-1(8.37E-3)≈ | 6.61E-1(8.38E-3)≈ | 6.59E-1(8.78E-3)≈ | 6.58E-1(7.74E-3)≈ |
|       | 6  | 7.93E-1(8.70E-3) | 7.99E-1(6.00E-3)- | 7.98E-1(9.34E-3)≈ | 7.96E-1(9.48E-3)≈ | 7.93E-1(1.01E-2)≈ |
|       | 8  | 8.38E-1(1.85E-2) | 8.41E-1(1.58E-2)≈ | 8.39E-1(1.86E-2)≈ | 8.41E-1(1.71E-2)≈ | 8.41E-1(1.79E-2)≈ |
|       | 10 | 8.84E-1(1.39E-2) | 8.78E-1(1.54E-2)≈ | 8.75E-1(2.12E-2)+ | 8.78E-1(1.50E-2)≈ | 8.85E-1(1.63E-2)≈ |
| WFG7  | 2  | 3.47E-1(1.74E-5) | 3.47E-1(2.04E-5)≈ | 3.47E-1(1.98E-5)≈ | 3.47E-1(1.75E-5)≈ | 3.47E-1(2.05E-5)≈ |
|       | 4  | 7.12E-1(5.59E-4) | 7.12E-1(5.96E-4)≈ | 7.12E-1(6.03E-4)≈ | 7.12E-1(7.24E-4)≈ | 7.12E-1(5.90E-4)≈ |
|       | 6  | 8.55E-1(7.27E-4) | 8.55E-1(8.20E-4)≈ | 8.55E-1(9.75E-4)≈ | 8.55E-1(8.41E-4)≈ | 8.55E-1(6.42E-4)≈ |
|       | 8  | 9.17E-1(1.06E-3) | 9.17E-1(1.09E-3)≈ | 9.17E-1(1.20E-3)≈ | 9.14E-1(1.61E-2)≈ | 9.16E-1(7.31E-3)≈ |
|       | 10 | 9.61E-1(1.22E-2) | 9.58E-1(1.54E-2)≈ | 9.62E-1(1.16E-2)≈ | 9.62E-1(1.13E-2)≈ | 9.61E-1(1.39E-2)≈ |
| WFG8  | 2  | 3.03E-1(5.61E-4) | 3.03E-1(4.43E-4)≈ | 3.02E-1(4.46E-4)≈ | 3.03E-1(5.29E-4)≈ | 3.03E-1(4.80E-4)≈ |
|       | 4  | 6.35E-1(8.40E-4) | 6.34E-1(1.70E-3)≈ | 6.35E-1(9.54E-4)≈ | 6.34E-1(2.61E-3)≈ | 6.34E-1(9.33E-4)≈ |
|       | 6  | 7.64E-1(1.88E-2) | 7.67E-1(1.95E-3)≈ | 7.68E-1(1.54E-3)≈ | 7.67E-1(1.63E-3)≈ | 7.67E-1(1.88E-3)≈ |
|       | 8  | 7.84E-1(2.76E-2) | 7.84E-1(2.74E-2)≈ | 7.84E-1(2.39E-2)≈ | 7.85E-1(2.46E-2)≈ | 7.82E-1(2.32E-2)≈ |
|       | 10 | 8.64E-1(1.67E-2) | 8.68E-1(1.81E-2)≈ | 8.62E-1(1.41E-2)≈ | 8.65E-1(1.60E-2)≈ | 8.64E-1(1.83E-2)≈ |
| WFG9  | 2  | 3.40E-1(1.68E-2) | 3.39E-1(1.67E-2)≈ | 3.40E-1(1.67E-2)≈ | 3.40E-1(1.67E-2)≈ | 3.43E-1(9.86E-4)≈ |
|       | 4  | 6.76E-1(3.38E-3) | 6.77E-1(3.22E-3)≈ | 6.77E-1(3.05E-3)≈ | 6.76E-1(3.44E-3)≈ | 6.75E-1(2.84E-3)≈ |
|       | 6  | 7.81E-1(3.07E-2) | 7.82E-1(2.70E-2)≈ | 7.92E-1(1.68E-2)- | 7.91E-1(1.66E-2)≈ | 7.91E-1(1.55E-2)≈ |
|       | 8  | 8.28E-1(4.89E-2) | 8.20E-1(6.04E-2)≈ | 8.49E-1(9.47E-3)- | 8.31E-1(4.92E-2)≈ | 8.11E-1(6.70E-2)≈ |
|       | 10 | 8.68E-1(6.04E-2) | 8.76E-1(5.84E-2)≈ | 8.99E-1(8.01E-3)- | 8.83E-1(4.57E-2)≈ | 8.85E-1(4.24E-2)≈ |
|       |    | <b>W/L/T</b>     | <b>3/4/73</b>     | <b>10/7/63</b>    | <b>2/4/74</b>     | <b>3/4/73</b>     |

**Table S4**  
**Comparison of HV and Statistical Results on DTLZ And WFG Test Problems (“+”–Win, “≈”–Tie, “-”–Loss)**

| #     | M  | NSGA-III <sub>4</sub> * | NSGA-III <sub>1</sub> * | NSGA-III <sub>2</sub> * | NSGA-III <sub>3</sub> * | NSGA-III <sub>5</sub> * |
|-------|----|-------------------------|-------------------------|-------------------------|-------------------------|-------------------------|
| DTLZ1 | 2  | 5.83E-1(9.73E-5)        | 5.82E-1(1.75E-4)+       | 5.83E-1(5.40E-5)≈       | 5.82E-1(1.42E-4)≈       | 5.82E-1(1.83E-4)≈       |
|       | 4  | 9.45E-1(2.63E-4)        | 9.45E-1(1.73E-4)≈       | 9.45E-1(2.41E-4)≈       | 9.45E-1(3.07E-4)≈       | 9.45E-1(2.47E-4)≈       |
|       | 6  | 9.90E-1(1.05E-4)        | 9.90E-1(3.95E-3)≈       | 9.90E-1(1.13E-4)≈       | 9.89E-1(5.41E-3)≈       | 9.90E-1(8.37E-5)≈       |
|       | 8  | 9.97E-1(1.76E-3)        | 9.85E-1(6.71E-2)≈       | 9.97E-1(1.14E-3)≈       | 9.98E-1(6.72E-5)≈       | 9.98E-1(5.02E-4)≈       |
|       | 10 | 1.00E+0(2.62E-4)        | 9.96E-1(1.91E-2)≈       | 9.97E-1(1.49E-2)≈       | 9.96E-1(1.67E-2)≈       | 1.00E+0(2.26E-4)≈       |
| DTLZ2 | 2  | 3.47E-1(4.83E-7)        | 3.47E-1(6.33E-7)≈       | 3.47E-1(1.33E-7)≈       | 3.47E-1(2.01E-7)≈       | 3.47E-1(8.51E-8)≈       |
|       | 4  | 7.15E-1(3.47E-4)        | 7.15E-1(4.85E-4)≈       | 7.15E-1(4.62E-4)≈       | 7.15E-1(3.97E-4)-       | 7.15E-1(4.04E-4)-       |
|       | 6  | 8.61E-1(3.77E-4)        | 8.61E-1(3.63E-4)≈       | 8.61E-1(4.42E-4)≈       | 8.61E-1(3.99E-4)≈       | 8.61E-1(3.07E-4)≈       |
|       | 8  | 9.21E-1(1.77E-2)        | 9.21E-1(2.60E-2)≈       | 9.17E-1(2.53E-2)≈       | 9.26E-1(3.19E-4)≈       | 9.25E-1(5.71E-3)≈       |
|       | 10 | 9.64E-1(1.42E-2)        | 9.66E-1(1.23E-2)≈       | 9.66E-1(1.17E-2)≈       | 9.59E-1(2.02E-2)≈       | 9.62E-1(1.76E-2)≈       |
| DTLZ3 | 2  | 3.46E-1(7.35E-4)        | 3.45E-1(1.46E-3)+       | 3.46E-1(1.08E-3)+       | 3.46E-1(1.11E-3)+       | 3.46E-1(9.63E-4)≈       |
|       | 4  | 7.14E-1(1.59E-3)        | 7.13E-1(2.05E-3)≈       | 7.14E-1(1.32E-3)≈       | 7.13E-1(1.35E-3)≈       | 7.13E-1(1.94E-3)+       |
|       | 6  | 8.57E-1(3.02E-3)        | 8.57E-1(3.03E-3)≈       | 8.56E-1(3.34E-3)≈       | 8.57E-1(2.33E-3)≈       | 8.57E-1(3.53E-3)≈       |
|       | 8  | 9.23E-1(2.54E-3)        | 9.13E-1(5.09E-2)≈       | 9.23E-1(1.83E-3)≈       | 9.02E-1(8.18E-2)≈       | 9.23E-1(1.97E-3)≈       |
|       | 10 | 9.03E-1(1.67E-1)        | 9.38E-1(6.96E-2)≈       | 9.67E-1(5.85E-3)-       | 9.48E-1(4.46E-2)≈       | 9.24E-1(9.38E-2)≈       |
| DTLZ4 | 2  | 3.47E-1(5.33E-5)        | 3.47E-1(1.53E-5)≈       | 3.47E-1(1.20E-4)≈       | 3.47E-1(1.06E-5)≈       | 3.47E-1(4.39E-6)≈       |
|       | 4  | 7.15E-1(4.98E-4)        | 7.10E-1(2.87E-2)≈       | 6.89E-1(6.09E-2)+       | 7.04E-1(4.04E-2)≈       | 6.94E-1(5.59E-2)+       |
|       | 6  | 8.53E-1(3.12E-2)        | 8.61E-1(3.89E-4)≈       | 8.51E-1(3.20E-2)≈       | 8.61E-1(3.15E-4)≈       | 8.61E-1(4.53E-4)≈       |
|       | 8  | 9.26E-1(2.68E-4)        | 9.20E-1(2.69E-2)≈       | 9.12E-1(3.05E-2)+       | 9.17E-1(2.52E-2)+       | 9.24E-1(8.55E-3)≈       |
|       | 10 | 9.66E-1(1.29E-2)        | 9.67E-1(1.17E-2)≈       | 9.66E-1(1.08E-2)≈       | 9.64E-1(1.38E-2)≈       | 9.68E-1(8.98E-3)≈       |
| DTLZ5 | 2  | 3.47E-1(4.55E-8)        | 3.47E-1(5.99E-7)≈       | 3.47E-1(7.05E-7)+       | 3.47E-1(4.99E-8)≈       | 3.47E-1(9.57E-8)≈       |
|       | 4  | 1.40E-1(2.32E-3)        | 1.40E-1(3.64E-3)≈       | 1.40E-1(2.10E-3)≈       | 1.41E-1(2.38E-3)≈       | 1.41E-1(2.10E-3)≈       |
|       | 6  | 9.70E-2(5.24E-3)        | 9.59E-2(1.07E-2)≈       | 9.75E-2(4.12E-3)≈       | 9.88E-2(3.82E-3)≈       | 9.86E-2(2.67E-3)≈       |
|       | 8  | 9.21E-2(2.62E-3)        | 9.16E-2(2.09E-3)≈       | 9.21E-2(2.27E-3)≈       | 9.20E-2(2.38E-3)≈       | 9.13E-2(2.25E-3)≈       |
|       | 10 | 8.83E-2(3.04E-3)        | 8.90E-2(2.31E-3)≈       | 8.62E-2(5.54E-3)+       | 8.92E-2(2.71E-3)≈       | 8.74E-2(3.65E-3)≈       |
| DTLZ6 | 2  | 3.47E-1(4.68E-8)        | 3.47E-1(4.71E-8)≈       | 3.47E-1(4.08E-8)≈       | 3.47E-1(2.69E-8)≈       | 3.47E-1(3.98E-8)≈       |
|       | 4  | 1.35E-1(5.32E-3)        | 1.36E-1(3.63E-3)≈       | 1.33E-1(1.03E-2)≈       | 1.35E-1(6.91E-3)≈       | 1.32E-1(9.32E-3)≈       |
|       | 6  | 9.15E-2(1.99E-3)        | 9.13E-2(1.34E-3)≈       | 9.21E-2(2.91E-3)≈       | 9.14E-2(1.73E-3)≈       | 9.12E-2(1.30E-3)≈       |
|       | 8  | 9.10E-2(5.71E-4)        | 9.11E-2(8.75E-4)≈       | 9.11E-2(5.32E-4)≈       | 9.11E-2(8.47E-4)≈       | 9.11E-2(5.17E-4)≈       |
|       | 10 | 9.10E-2(3.17E-4)        | 9.09E-2(2.24E-4)≈       | 9.09E-2(2.07E-4)≈       | 9.09E-2(2.81E-4)≈       | 8.63E-2(1.82E-2)≈       |
| DTLZ7 | 2  | 2.43E-1(1.29E-5)        | 2.43E-1(2.07E-5)≈       | 2.43E-1(1.87E-5)≈       | 2.43E-1(1.96E-5)≈       | 2.43E-1(1.46E-5)≈       |
|       | 4  | 2.57E-1(5.59E-3)        | 2.58E-1(3.82E-3)≈       | 2.58E-1(5.50E-3)≈       | 2.58E-1(3.86E-3)≈       | 2.59E-1(5.89E-3)≈       |
|       | 6  | 2.31E-1(2.68E-3)        | 2.30E-1(2.84E-3)≈       | 2.31E-1(2.74E-3)≈       | 2.31E-1(2.48E-3)≈       | 2.30E-1(2.50E-3)≈       |
|       | 8  | 2.13E-1(2.75E-3)        | 2.12E-1(2.36E-3)≈       | 2.12E-1(2.94E-3)≈       | 2.13E-1(2.58E-3)≈       | 2.12E-1(2.84E-3)≈       |
|       | 10 | 1.82E-1(7.56E-3)        | 1.82E-1(7.54E-3)≈       | 1.81E-1(7.78E-3)≈       | 1.80E-1(7.46E-3)≈       | 1.85E-1(7.92E-3)≈       |
| WFG1  | 2  | 6.77E-1(6.99E-3)        | 6.73E-1(8.85E-3)+       | 6.77E-1(5.95E-3)≈       | 6.73E-1(1.17E-2)+       | 6.69E-1(2.10E-2)+       |
|       | 4  | 9.82E-1(9.63E-3)        | 9.83E-1(9.86E-3)≈       | 9.84E-1(8.16E-3)≈       | 9.83E-1(8.62E-3)≈       | 9.82E-1(1.09E-2)≈       |
|       | 6  | 8.58E-1(2.14E-2)        | 8.59E-1(2.95E-2)≈       | 8.70E-1(2.21E-2)-       | 8.62E-1(2.30E-2)≈       | 8.41E-1(2.61E-2)+       |
|       | 8  | 9.83E-1(2.61E-2)        | 9.89E-1(1.95E-2)≈       | 9.83E-1(2.32E-2)≈       | 9.93E-1(1.06E-2)-       | 9.85E-1(2.82E-2)≈       |
|       | 10 | 9.99E-1(5.31E-4)        | 9.99E-1(3.07E-4)≈       | 9.99E-1(6.37E-4)≈       | 9.99E-1(3.30E-4)≈       | 9.99E-1(3.94E-4)≈       |
| WFG2  | 2  | 6.32E-1(4.81E-4)        | 6.32E-1(3.13E-4)-       | 6.32E-1(3.82E-4)-       | 6.32E-1(4.89E-4)≈       | 6.32E-1(3.20E-4)-       |
|       | 4  | 9.88E-1(4.40E-4)        | 9.88E-1(6.01E-4)≈       | 9.88E-1(4.99E-4)≈       | 9.88E-1(4.14E-4)≈       | 9.88E-1(3.87E-4)≈       |
|       | 6  | 9.95E-1(8.58E-4)        | 9.95E-1(9.23E-4)≈       | 9.95E-1(9.24E-4)≈       | 9.95E-1(8.78E-4)≈       | 9.95E-1(8.78E-4)≈       |
|       | 8  | 9.96E-1(1.54E-3)        | 9.96E-1(1.12E-3)≈       | 9.96E-1(1.11E-3)≈       | 9.97E-1(1.07E-3)≈       | 9.97E-1(1.13E-3)≈       |
|       | 10 | 9.97E-1(9.06E-4)        | 9.98E-1(9.61E-4)-       | 9.97E-1(1.09E-3)≈       | 9.97E-1(1.19E-3)≈       | 9.97E-1(1.54E-3)≈       |
| WFG3  | 2  | 5.82E-1(2.12E-4)        | 5.82E-1(2.48E-4)+       | 5.82E-1(2.75E-4)≈       | 5.82E-1(2.14E-4)+       | 5.82E-1(2.22E-4)≈       |
|       | 4  | 2.55E-1(6.72E-3)        | 2.55E-1(7.27E-3)≈       | 2.56E-1(9.22E-3)≈       | 2.55E-1(6.04E-3)≈       | 2.55E-1(8.01E-3)≈       |
|       | 6  | 4.70E-2(1.82E-2)        | 5.04E-2(2.00E-2)≈       | 5.37E-2(1.83E-2)≈       | 5.04E-2(2.58E-2)≈       | 5.44E-2(2.01E-2)≈       |
|       | 8  | 2.08E-2(1.43E-2)        | 2.95E-2(1.56E-2)-       | 3.62E-2(1.85E-2)-       | 2.39E-2(1.93E-2)≈       | 2.33E-2(1.79E-2)≈       |
|       | 10 | 2.68E-3(8.51E-3)        | 8.98E-3(9.60E-3)-       | 1.93E-2(8.65E-3)-       | 5.58E-4(1.08E-3)≈       | 3.06E-3(7.07E-3)≈       |
| WFG4  | 2  | 3.47E-1(4.39E-5)        | 3.47E-1(3.93E-5)≈       | 3.47E-1(4.10E-5)≈       | 3.47E-1(5.41E-5)≈       | 3.47E-1(5.02E-5)≈       |
|       | 4  | 7.11E-1(9.62E-4)        | 7.11E-1(9.16E-4)≈       | 7.12E-1(6.59E-4)≈       | 7.11E-1(9.85E-4)≈       | 7.11E-1(9.10E-4)≈       |
|       | 6  | 8.45E-1(1.72E-2)        | 8.48E-1(2.03E-2)≈       | 8.48E-1(1.21E-2)≈       | 8.45E-1(1.74E-2)≈       | 8.47E-1(1.53E-2)≈       |
|       | 8  | 9.12E-1(1.41E-3)        | 9.12E-1(2.57E-3)≈       | 9.07E-1(2.21E-2)≈       | 9.08E-1(1.59E-2)≈       | 9.13E-1(2.42E-3)≈       |
|       | 10 | 9.60E-1(6.68E-3)        | 9.61E-1(1.72E-3)≈       | 9.60E-1(2.80E-3)≈       | 9.61E-1(1.78E-3)≈       | 9.61E-1(1.37E-3)≈       |
| WFG5  | 2  | 3.13E-1(1.00E-3)        | 3.13E-1(5.99E-5)≈       | 3.13E-1(2.95E-5)≈       | 3.13E-1(6.27E-5)≈       | 3.13E-1(1.26E-5)≈       |
|       | 4  | 6.69E-1(5.48E-4)        | 6.68E-1(5.20E-4)+       | 6.69E-1(4.72E-4)≈       | 6.69E-1(5.11E-4)≈       | 6.69E-1(4.63E-4)≈       |
|       | 6  | 8.06E-1(4.44E-4)        | 8.06E-1(4.40E-4)≈       | 8.05E-1(4.21E-4)≈       | 8.06E-1(3.87E-4)≈       | 8.06E-1(4.48E-4)≈       |
|       | 8  | 8.63E-1(7.01E-4)        | 8.63E-1(6.86E-4)≈       | 8.63E-1(4.66E-4)≈       | 8.63E-1(6.30E-4)≈       | 8.63E-1(8.25E-4)≈       |
|       | 10 | 9.03E-1(3.27E-4)        | 9.04E-1(3.44E-4)≈       | 9.04E-1(2.35E-4)≈       | 9.04E-1(2.72E-4)≈       | 9.04E-1(3.25E-4)≈       |
| WFG6  | 2  | 3.11E-1(6.92E-3)        | 3.08E-1(8.20E-3)≈       | 3.07E-1(5.28E-3)+       | 3.08E-1(6.81E-3)≈       | 3.09E-1(7.33E-3)≈       |
|       | 4  | 6.59E-1(8.78E-3)        | 6.61E-1(8.37E-3)≈       | 6.61E-1(8.38E-3)≈       | 6.60E-1(7.44E-3)≈       | 6.58E-1(7.74E-3)≈       |
|       | 6  | 7.96E-1(9.48E-3)        | 7.99E-1(6.00E-3)≈       | 7.98E-1(9.34E-3)≈       | 7.93E-1(8.70E-3)≈       | 7.93E-1(1.01E-2)≈       |
|       | 8  | 8.41E-1(1.71E-2)        | 8.41E-1(1.58E-2)≈       | 8.39E-1(1.86E-2)≈       | 8.38E-1(1.85E-2)≈       | 8.41E-1(1.79E-2)≈       |
|       | 10 | 8.78E-1(1.50E-2)        | 8.78E-1(1.54E-2)≈       | 8.75E-1(2.12E-2)≈       | 8.84E-1(1.39E-2)≈       | 8.85E-1(1.63E-2)≈       |



**Table S4**  
(Continue)

|       |    |                  |                   |                   |                   |                   |
|-------|----|------------------|-------------------|-------------------|-------------------|-------------------|
| WFG7  | 2  | 3.47E-1(1.75E-5) | 3.47E-1(2.04E-5)≈ | 3.47E-1(1.98E-5)≈ | 3.47E-1(1.74E-5)≈ | 3.47E-1(2.05E-5)≈ |
|       | 4  | 7.12E-1(7.24E-4) | 7.12E-1(5.96E-4)≈ | 7.12E-1(6.03E-4)≈ | 7.12E-1(5.59E-4)≈ | 7.12E-1(5.90E-4)≈ |
|       | 6  | 8.55E-1(8.41E-4) | 8.55E-1(8.20E-4)≈ | 8.55E-1(9.75E-4)≈ | 8.55E-1(7.27E-4)≈ | 8.55E-1(6.42E-4)≈ |
|       | 8  | 9.14E-1(1.61E-2) | 9.17E-1(1.09E-3)≈ | 9.17E-1(1.20E-3)≈ | 9.17E-1(1.06E-3)≈ | 9.16E-1(7.31E-3)≈ |
|       | 10 | 9.62E-1(1.13E-2) | 9.58E-1(1.54E-2)≈ | 9.62E-1(1.16E-2)≈ | 9.61E-1(1.22E-2)≈ | 9.61E-1(1.39E-2)≈ |
| WFG8  | 2  | 3.03E-1(5.29E-4) | 3.03E-1(4.43E-4)≈ | 3.02E-1(4.46E-4)≈ | 3.03E-1(5.61E-4)≈ | 3.03E-1(4.80E-4)≈ |
|       | 4  | 6.34E-1(2.61E-3) | 6.34E-1(1.70E-3)≈ | 6.35E-1(9.54E-4)≈ | 6.35E-1(8.40E-4)≈ | 6.34E-1(9.33E-4)≈ |
|       | 6  | 7.67E-1(1.63E-3) | 7.67E-1(1.95E-3)≈ | 7.68E-1(1.54E-3)≈ | 7.64E-1(1.88E-2)≈ | 7.67E-1(1.88E-3)≈ |
|       | 8  | 7.85E-1(2.46E-2) | 7.84E-1(2.74E-2)≈ | 7.84E-1(2.39E-2)≈ | 7.84E-1(2.76E-2)≈ | 7.82E-1(2.32E-2)≈ |
|       | 10 | 8.65E-1(1.60E-2) | 8.68E-1(1.81E-2)≈ | 8.62E-1(1.41E-2)≈ | 8.64E-1(1.67E-2)≈ | 8.64E-1(1.83E-2)≈ |
| WFG9  | 2  | 3.40E-1(1.67E-2) | 3.39E-1(1.67E-2)≈ | 3.40E-1(1.67E-2)≈ | 3.40E-1(1.68E-2)≈ | 3.43E-1(9.86E-4)≈ |
|       | 4  | 6.76E-1(3.44E-3) | 6.77E-1(3.22E-3)≈ | 6.77E-1(3.05E-3)≈ | 6.76E-1(3.38E-3)≈ | 6.75E-1(2.84E-3)≈ |
|       | 6  | 7.91E-1(1.66E-2) | 7.82E-1(2.70E-2)≈ | 7.92E-1(1.68E-2)≈ | 7.81E-1(3.07E-2)≈ | 7.91E-1(1.55E-2)≈ |
|       | 8  | 8.31E-1(4.92E-2) | 8.20E-1(6.04E-2)≈ | 8.49E-1(9.47E-3)- | 8.28E-1(4.89E-2)≈ | 8.11E-1(6.70E-2)≈ |
|       | 10 | 8.83E-1(4.57E-2) | 8.76E-1(5.84E-2)≈ | 8.99E-1(8.01E-3)- | 8.68E-1(6.04E-2)≈ | 8.85E-1(4.24E-2)≈ |
| W/L/T |    | 5/4/71           | 6/7/67            | 4/2/74            | 4/2/74            |                   |

**Table S5**

Comparison of HV and Statistical Results on DTLZ And WFG Test Problems (“+”-Win, “≈”-Tie, “-”-Loss)

| #     | M  | NSGA-III <sub>5</sub> * | NSGA-III <sub>1</sub> * | NSGA-III <sub>2</sub> * | NSGA-III <sub>3</sub> * | NSGA-III <sub>4</sub> * |
|-------|----|-------------------------|-------------------------|-------------------------|-------------------------|-------------------------|
| DTLZ1 | 2  | 5.82E-1(1.83E-4)        | 5.82E-1(1.75E-4)≈       | 5.83E-1(5.40E-5)≈       | 5.82E-1(1.42E-4)≈       | 5.83E-1(9.73E-5)≈       |
|       | 4  | 9.45E-1(2.47E-4)        | 9.45E-1(1.73E-4)≈       | 9.45E-1(2.41E-4)≈       | 9.45E-1(3.07E-4)≈       | 9.45E-1(2.63E-4)≈       |
|       | 6  | 9.90E-1(8.37E-5)        | 9.90E-1(3.95E-3)≈       | 9.90E-1(1.13E-4)≈       | 9.89E-1(5.41E-3)≈       | 9.90E-1(1.05E-4)≈       |
|       | 8  | 9.98E-1(5.02E-4)        | 9.85E-1(6.71E-2)≈       | 9.97E-1(1.14E-3)≈       | 9.98E-1(6.72E-5)≈       | 9.97E-1(1.76E-3)≈       |
|       | 10 | 1.00E+0(2.26E-4)        | 9.96E-1(1.91E-2)≈       | 9.97E-1(1.49E-2)≈       | 9.96E-1(1.67E-2)≈       | 1.00E+0(2.62E-4)≈       |
| DTLZ2 | 2  | 3.47E-1(8.51E-8)        | 3.47E-1(6.33E-7)≈       | 3.47E-1(1.33E-7)≈       | 3.47E-1(2.01E-7)≈       | 3.47E-1(4.83E-7)≈       |
|       | 4  | 7.15E-1(4.04E-4)        | 7.15E-1(4.85E-4)+       | 7.15E-1(4.62E-4)≈       | 7.15E-1(3.97E-4)≈       | 7.15E-1(3.47E-4)+       |
|       | 6  | 8.61E-1(3.07E-4)        | 8.61E-1(3.63E-4)≈       | 8.61E-1(4.42E-4)≈       | 8.61E-1(3.99E-4)≈       | 8.61E-1(3.77E-4)≈       |
|       | 8  | 9.25E-1(5.71E-3)        | 9.21E-1(2.60E-2)≈       | 9.17E-1(2.53E-2)≈       | 9.26E-1(3.19E-4)≈       | 9.21E-1(1.77E-2)≈       |
|       | 10 | 9.62E-1(1.76E-2)        | 9.66E-1(1.23E-2)≈       | 9.66E-1(1.17E-2)≈       | 9.59E-1(2.02E-2)≈       | 9.64E-1(1.42E-2)≈       |
| DTLZ3 | 2  | 3.46E-1(9.63E-4)        | 3.45E-1(1.46E-3)+       | 3.46E-1(1.08E-3)≈       | 3.46E-1(1.11E-3)≈       | 3.46E-1(7.35E-4)≈       |
|       | 4  | 7.13E-1(1.94E-3)        | 7.13E-1(2.05E-3)≈       | 7.14E-1(1.32E-3)≈       | 7.13E-1(1.35E-3)≈       | 7.14E-1(1.59E-3)-       |
|       | 6  | 8.57E-1(3.53E-3)        | 8.57E-1(3.03E-3)≈       | 8.56E-1(3.34E-3)≈       | 8.57E-1(2.33E-3)≈       | 8.57E-1(3.02E-3)≈       |
|       | 8  | 9.23E-1(1.97E-3)        | 9.13E-1(5.09E-2)≈       | 9.23E-1(1.83E-3)≈       | 9.02E-1(8.18E-2)≈       | 9.23E-1(2.54E-3)≈       |
|       | 10 | 9.24E-1(9.38E-2)        | 9.38E-1(6.96E-2)≈       | 9.67E-1(5.85E-3)≈       | 9.48E-1(4.46E-2)≈       | 9.03E-1(1.67E-1)≈       |
| DTLZ4 | 2  | 3.47E-1(4.39E-6)        | 3.47E-1(1.53E-5)≈       | 3.47E-1(1.20E-4)≈       | 3.47E-1(1.06E-5)≈       | 3.47E-1(5.33E-5)≈       |
|       | 4  | 6.94E-1(5.59E-2)        | 7.10E-1(2.87E-2)≈       | 6.89E-1(6.09E-2)≈       | 7.04E-1(4.04E-2)≈       | 7.15E-1(4.98E-4)-       |
|       | 6  | 8.61E-1(4.53E-4)        | 8.61E-1(3.89E-4)≈       | 8.51E-1(3.20E-2)+       | 8.61E-1(3.15E-4)≈       | 8.53E-1(3.12E-2)≈       |
|       | 8  | 9.24E-1(8.55E-3)        | 9.20E-1(2.69E-2)≈       | 9.12E-1(3.05E-2)+       | 9.17E-1(2.52E-2)≈       | 9.26E-1(2.68E-4)≈       |
|       | 10 | 9.68E-1(8.98E-3)        | 9.67E-1(1.17E-2)≈       | 9.66E-1(1.08E-2)≈       | 9.64E-1(1.38E-2)≈       | 9.66E-1(1.29E-2)≈       |
| DTLZ5 | 2  | 3.47E-1(9.57E-8)        | 3.47E-1(5.99E-7)≈       | 3.47E-1(7.05E-7)≈       | 3.47E-1(4.99E-8)≈       | 3.47E-1(4.55E-8)≈       |
|       | 4  | 1.41E-1(2.10E-3)        | 1.40E-1(3.64E-3)≈       | 1.40E-1(2.10E-3)≈       | 1.41E-1(2.38E-3)≈       | 1.40E-1(2.32E-3)≈       |
|       | 6  | 9.86E-2(2.67E-3)        | 9.59E-2(1.07E-2)≈       | 9.75E-2(4.12E-3)≈       | 9.88E-2(3.82E-3)≈       | 9.70E-2(5.24E-3)≈       |
|       | 8  | 9.13E-2(2.25E-3)        | 9.16E-2(2.09E-3)≈       | 9.21E-2(2.27E-3)≈       | 9.20E-2(2.38E-3)≈       | 9.21E-2(2.62E-3)≈       |
|       | 10 | 8.74E-2(3.65E-3)        | 8.90E-2(2.31E-3)≈       | 8.62E-2(5.54E-3)≈       | 8.92E-2(2.71E-3)-       | 8.83E-2(3.04E-3)≈       |
| DTLZ6 | 2  | 3.47E-1(3.98E-8)        | 3.47E-1(4.71E-8)≈       | 3.47E-1(4.08E-8)≈       | 3.47E-1(2.69E-8)≈       | 3.47E-1(4.68E-8)≈       |
|       | 4  | 1.32E-1(9.32E-3)        | 1.36E-1(3.63E-3)≈       | 1.33E-1(1.03E-2)≈       | 1.35E-1(6.91E-3)≈       | 1.35E-1(5.32E-3)≈       |
|       | 6  | 9.12E-2(1.30E-3)        | 9.13E-2(1.34E-3)≈       | 9.21E-2(2.91E-3)≈       | 9.14E-2(1.73E-3)≈       | 9.15E-2(1.99E-3)≈       |
|       | 8  | 9.11E-2(5.17E-4)        | 9.11E-2(8.75E-4)≈       | 9.11E-2(5.32E-4)≈       | 9.11E-2(8.47E-4)≈       | 9.10E-2(5.71E-4)≈       |
|       | 10 | 8.63E-2(1.82E-2)        | 9.09E-2(2.24E-4)≈       | 9.09E-2(2.07E-4)≈       | 9.09E-2(2.81E-4)≈       | 9.10E-2(3.17E-4)≈       |
| DTLZ7 | 2  | 2.43E-1(1.46E-5)        | 2.43E-1(2.07E-5)≈       | 2.43E-1(1.87E-5)≈       | 2.43E-1(1.96E-5)≈       | 2.43E-1(1.29E-5)≈       |
|       | 4  | 2.59E-1(5.89E-3)        | 2.58E-1(3.82E-3)≈       | 2.58E-1(5.50E-3)≈       | 2.58E-1(3.86E-3)≈       | 2.57E-1(5.59E-3)≈       |
|       | 6  | 2.30E-1(2.50E-3)        | 2.30E-1(2.84E-3)≈       | 2.31E-1(2.74E-3)≈       | 2.31E-1(2.48E-3)≈       | 2.31E-1(2.68E-3)≈       |
|       | 8  | 2.12E-1(2.84E-3)        | 2.12E-1(2.36E-3)≈       | 2.12E-1(2.94E-3)≈       | 2.13E-1(2.58E-3)≈       | 2.13E-1(2.75E-3)≈       |
|       | 10 | 1.85E-1(7.92E-3)        | 1.82E-1(7.54E-3)≈       | 1.81E-1(7.78E-3)≈       | 1.80E-1(7.46E-3)+       | 1.82E-1(7.56E-3)≈       |
| WFG1  | 2  | 6.69E-1(2.10E-2)        | 6.73E-1(8.85E-3)≈       | 6.77E-1(5.95E-3)≈       | 6.73E-1(1.17E-2)≈       | 6.77E-1(6.99E-3)≈       |
|       | 4  | 9.82E-1(1.09E-2)        | 9.83E-1(9.86E-3)≈       | 9.84E-1(8.16E-3)≈       | 9.83E-1(8.62E-3)≈       | 9.82E-1(9.63E-3)≈       |
|       | 6  | 8.41E-1(2.61E-2)        | 8.59E-1(2.95E-2)-       | 8.70E-1(2.21E-2)-       | 8.62E-1(2.30E-2)-       | 8.58E-1(2.14E-2)-       |
|       | 8  | 9.85E-1(2.82E-2)        | 9.89E-1(1.95E-2)≈       | 9.83E-1(2.32E-2)≈       | 9.93E-1(1.06E-2)≈       | 9.83E-1(2.61E-2)≈       |
|       | 10 | 9.99E-1(3.94E-4)        | 9.99E-1(3.07E-4)-       | 9.99E-1(6.37E-4)≈       | 9.99E-1(3.30E-4)-       | 9.99E-1(5.31E-4)≈       |
| WFG2  | 2  | 6.32E-1(3.20E-4)        | 6.32E-1(3.13E-4)-       | 6.32E-1(3.82E-4)≈       | 6.32E-1(4.89E-4)≈       | 6.32E-1(4.81E-4)+       |
|       | 4  | 9.88E-1(3.87E-4)        | 9.88E-1(6.01E-4)≈       | 9.88E-1(4.99E-4)≈       | 9.88E-1(4.14E-4)≈       | 9.88E-1(4.40E-4)≈       |
|       | 6  | 9.95E-1(8.78E-4)        | 9.95E-1(9.23E-4)≈       | 9.95E-1(9.24E-4)≈       | 9.95E-1(8.78E-4)≈       | 9.95E-1(8.58E-4)≈       |
|       | 8  | 9.97E-1(1.13E-3)        | 9.96E-1(1.12E-3)≈       | 9.96E-1(1.11E-3)≈       | 9.97E-1(1.07E-3)≈       | 9.96E-1(1.54E-3)≈       |
|       | 10 | 9.97E-1(1.54E-3)        | 9.98E-1(9.61E-4)≈       | 9.97E-1(1.09E-3)≈       | 9.97E-1(1.19E-3)≈       | 9.97E-1(9.06E-4)≈       |

**Table S5**  
(Continue)

|      |    |                  |                   |                   |                   |                   |
|------|----|------------------|-------------------|-------------------|-------------------|-------------------|
| WFG3 | 2  | 5.82E-1(2.22E-4) | 5.82E-1(2.48E-4)+ | 5.82E-1(2.75E-4)≈ | 5.82E-1(2.14E-4)+ | 5.82E-1(2.12E-4)≈ |
|      | 4  | 2.55E-1(8.01E-3) | 2.55E-1(7.27E-3)≈ | 2.56E-1(9.22E-3)≈ | 2.55E-1(6.04E-3)≈ | 2.55E-1(6.72E-3)≈ |
|      | 6  | 5.44E-2(2.01E-2) | 5.04E-2(2.00E-2)≈ | 5.37E-2(1.83E-2)≈ | 5.04E-2(2.58E-2)≈ | 4.70E-2(1.82E-2)≈ |
|      | 8  | 2.33E-2(1.79E-2) | 2.95E-2(1.56E-2)≈ | 3.62E-2(1.85E-2)- | 2.39E-2(1.93E-2)≈ | 2.08E-2(1.43E-2)≈ |
|      | 10 | 3.06E-3(7.07E-3) | 8.98E-3(9.60E-3)- | 1.93E-2(8.65E-3)- | 5.58E-4(1.08E-3)+ | 2.68E-3(8.51E-3)≈ |
| WFG4 | 2  | 3.47E-1(5.02E-5) | 3.47E-1(3.93E-5)≈ | 3.47E-1(4.10E-5)≈ | 3.47E-1(5.41E-5)≈ | 3.47E-1(4.39E-5)≈ |
|      | 4  | 7.11E-1(9.10E-4) | 7.11E-1(9.16E-4)≈ | 7.12E-1(6.59E-4)≈ | 7.11E-1(9.85E-4)≈ | 7.11E-1(9.62E-4)≈ |
|      | 6  | 8.47E-1(1.53E-3) | 8.48E-1(2.03E-3)≈ | 8.48E-1(1.21E-3)≈ | 8.45E-1(1.74E-2)≈ | 8.45E-1(1.72E-2)≈ |
|      | 8  | 9.13E-1(2.42E-3) | 9.12E-1(2.57E-3)≈ | 9.07E-1(2.21E-2)≈ | 9.08E-1(1.59E-2)≈ | 9.12E-1(1.41E-3)≈ |
|      | 10 | 9.61E-1(1.37E-3) | 9.61E-1(1.72E-3)≈ | 9.60E-1(2.80E-3)≈ | 9.61E-1(1.78E-3)≈ | 9.60E-1(6.68E-3)≈ |
| WFG5 | 2  | 3.13E-1(1.26E-5) | 3.13E-1(5.99E-5)+ | 3.13E-1(2.95E-5)≈ | 3.13E-1(6.27E-5)≈ | 3.13E-1(1.00E-3)≈ |
|      | 4  | 6.69E-1(4.63E-4) | 6.68E-1(5.20E-4)+ | 6.69E-1(4.72E-4)≈ | 6.69E-1(5.11E-4)≈ | 6.69E-1(5.48E-4)≈ |
|      | 6  | 8.06E-1(4.48E-4) | 8.06E-1(4.40E-4)≈ | 8.05E-1(4.21E-4)≈ | 8.06E-1(3.87E-4)≈ | 8.06E-1(4.44E-4)≈ |
|      | 8  | 8.63E-1(8.25E-4) | 8.63E-1(6.86E-4)≈ | 8.63E-1(4.66E-4)≈ | 8.63E-1(6.30E-4)≈ | 8.63E-1(7.01E-4)≈ |
|      | 10 | 9.04E-1(3.25E-4) | 9.04E-1(3.44E-4)+ | 9.04E-1(2.35E-4)+ | 9.04E-1(2.72E-4)+ | 9.03E-1(3.27E-4)+ |
| WFG6 | 2  | 3.09E-1(7.33E-3) | 3.08E-1(8.20E-3)≈ | 3.07E-1(5.28E-3)≈ | 3.08E-1(6.81E-3)≈ | 3.11E-1(6.92E-3)≈ |
|      | 4  | 6.58E-1(7.74E-3) | 6.61E-1(8.37E-3)≈ | 6.61E-1(8.38E-3)≈ | 6.60E-1(7.44E-3)≈ | 6.59E-1(8.78E-3)≈ |
|      | 6  | 7.93E-1(1.01E-2) | 7.99E-1(6.00E-3)- | 7.98E-1(9.34E-3)- | 7.93E-1(8.70E-3)≈ | 7.96E-1(9.48E-3)≈ |
|      | 8  | 8.41E-1(1.79E-2) | 8.41E-1(1.58E-2)≈ | 8.39E-1(1.86E-2)≈ | 8.38E-1(1.85E-2)≈ | 8.41E-1(1.71E-2)≈ |
|      | 10 | 8.85E-1(1.63E-2) | 8.78E-1(1.54E-2)+ | 8.75E-1(2.12E-2)+ | 8.84E-1(1.39E-2)≈ | 8.78E-1(1.50E-2)≈ |
| WFG7 | 2  | 3.47E-1(2.05E-5) | 3.47E-1(2.04E-5)≈ | 3.47E-1(1.98E-5)≈ | 3.47E-1(1.74E-5)≈ | 3.47E-1(1.75E-5)≈ |
|      | 4  | 7.12E-1(5.90E-4) | 7.12E-1(5.96E-4)≈ | 7.12E-1(6.03E-4)≈ | 7.12E-1(5.59E-4)≈ | 7.12E-1(7.24E-4)≈ |
|      | 6  | 8.55E-1(6.42E-4) | 8.55E-1(8.20E-4)≈ | 8.55E-1(9.75E-4)≈ | 8.55E-1(7.27E-4)≈ | 8.55E-1(8.41E-4)≈ |
|      | 8  | 9.16E-1(7.31E-3) | 9.17E-1(1.09E-3)≈ | 9.17E-1(1.20E-3)≈ | 9.17E-1(1.06E-3)≈ | 9.14E-1(1.61E-2)≈ |
|      | 10 | 9.61E-1(1.39E-2) | 9.58E-1(1.54E-2)≈ | 9.62E-1(1.16E-2)≈ | 9.61E-1(1.22E-2)≈ | 9.62E-1(1.13E-2)≈ |
| WFG8 | 2  | 3.03E-1(4.80E-4) | 3.03E-1(4.43E-4)≈ | 3.02E-1(4.46E-4)≈ | 3.03E-1(5.61E-4)≈ | 3.03E-1(5.29E-4)≈ |
|      | 4  | 6.34E-1(9.33E-4) | 6.34E-1(1.70E-3)≈ | 6.35E-1(9.54E-4)≈ | 6.35E-1(8.40E-4)≈ | 6.34E-1(2.61E-3)≈ |
|      | 6  | 7.67E-1(1.88E-3) | 7.67E-1(1.95E-3)≈ | 7.68E-1(1.54E-3)≈ | 7.64E-1(1.88E-2)≈ | 7.67E-1(1.63E-3)≈ |
|      | 8  | 7.82E-1(2.32E-2) | 7.84E-1(2.74E-2)≈ | 7.84E-1(2.39E-2)≈ | 7.84E-1(2.76E-2)≈ | 7.85E-1(2.46E-2)≈ |
|      | 10 | 8.64E-1(1.83E-2) | 8.68E-1(1.81E-2)≈ | 8.62E-1(1.41E-2)≈ | 8.64E-1(1.67E-2)≈ | 8.65E-1(1.60E-2)≈ |
| WFG9 | 2  | 3.43E-1(9.86E-4) | 3.39E-1(1.67E-2)≈ | 3.40E-1(1.67E-2)≈ | 3.40E-1(1.68E-2)≈ | 3.40E-1(1.67E-2)≈ |
|      | 4  | 6.75E-1(2.84E-3) | 6.77E-1(3.22E-3)≈ | 6.77E-1(3.05E-3)- | 6.76E-1(3.38E-3)≈ | 6.76E-1(3.44E-3)≈ |
|      | 6  | 7.91E-1(1.55E-2) | 7.82E-1(2.70E-2)≈ | 7.92E-1(1.68E-2)≈ | 7.81E-1(3.07E-2)≈ | 7.91E-1(1.66E-2)≈ |
|      | 8  | 8.11E-1(6.70E-2) | 8.20E-1(6.04E-2)≈ | 8.49E-1(9.47E-3)- | 8.28E-1(4.89E-2)≈ | 8.31E-1(4.92E-2)≈ |
|      | 10 | 8.85E-1(4.24E-2) | 8.76E-1(5.84E-2)≈ | 8.99E-1(8.01E-3)- | 8.68E-1(6.04E-2)≈ | 8.83E-1(4.57E-2)≈ |
|      |    |                  | <b>7/5/68</b>     | <b>4/7/69</b>     | <b>4/3/73</b>     | <b>3/3/74</b>     |
